# Supplementary material
Source: publisher figshare collection journal article supplement (https://geolsoc.figshare.com/ndownloader/files/24782350)
Supplement: Supplementary file 1 [file 24782350]

Single grain zircon (U-Th)/He data - Hanwen Dong (December 2016)
Sample No.	Analytical No.	He#	Corrected 4He (ncc)	Mass (mg)	aMean FT	U ppm	Th ppm	Th/U	b[eU] ppm	Age (Ma)	Error ��1s (Ma)	Grain length (mm)	Grain width (mm)	cGrain morphology
KY-1-5-1	14671	47201	1.758	0.0056	0.79	398.5	68.0	0.17	414.5	6.2	0.4	182.0	107.6	2T
KY-1-5-1	14672	47204	1.229	0.0070	0.76	206.2	84.4	0.41	226.0	6.4	0.4	292.6	80.2	2T
KY-1-5-1	14673	47207	1.912	0.0069	0.78	348.2	66.1	0.19	363.8	6.3	0.4	241.7	92.1	2T
			1.633	0.0	0.8	317.6	72.8	0.3	334.7	6.3	0.4	238.8	93.3
KY-1-7	14675	47234	10.672	0.0057	0.78	2153.0	256.7	0.12	2213.3	7.0	0.4	212.1	91.8	2T
KY-1-7	14676	47237	28.493	0.0057	0.78	5351.7	1008.1	0.19	5588.6	7.3	0.5	187.4	105.8	2T
KY-1-7	14677	47240	6.696	0.0100	0.82	850.8	159.7	0.19	888.4	6.2	0.4	244.4	116.1	2T
KY-1-9	14678	47243	1.041	0.0074	0.79	178.2	73.9	0.41	195.6	5.9	0.4	225.7	102.8	2T
KY-1-9	14679	47246	1.561	0.0083	0.80	218.7	53.8	0.25	231.3	6.7	0.4	251.3	99.9	2T
KY-1-9	14680	47249	1.192	0.0047	0.74	265.9	120.8	0.45	294.3	7.0	0.4	218.0	79.8	2T
KY-1-12	14681	47252	21.912	0.0286	0.86	1164.4	42.9	0.04	1174.5	5.4	0.3	430.9	136.0	2T
KY-1-12	14683	47258	36.265	0.0463	0.88	1117.8	37.4	0.03	1126.6	5.7	0.4	495.1	162.6	2T
KY-1-14-1	14684	47261	5.164	0.0109	0.80	653.1	62.4	0.10	667.7	5.8	0.4	316.6	97.9	2T
KY-1-14-1	14685	47264	22.487	0.0146	0.82	1696.5	39.6	0.02	1705.8	7.4	0.5	351.8	107.2	2T
KY-1-14-1	14686	47267	7.699	0.0190	0.84	531.9	78.1	0.15	550.3	6.1	0.4	363.3	122.0	2T
Fish Canyon Tuff standard
Fish Canyon Tuff	14709	47303	10.387	0.0095	0.81	291.2	133.4	0.46	322.5	27.8	1.7	261.8	105.0	2T
Fish Canyon Tuff	14710	47306	8.682	0.0064	0.76	352.1	181.4	0.52	394.7	28.2	1.8	247.6	86.2	2T
aFT is the a-ejection correction after Farley et al. (1996).
bEffective uranium concentration (U ppm + 0.235 Th ppm).
cGrain morphology - 0T = no terminations, 1T = one termination, 2T = 2 terminations.
															Zhangbao Zhao
															Zhangbao Zhao
															Abaz	nothing
															Abaz
															Abaz
